# Supplementary material
Source: Springer Nature journal article supplement (https://www.springermedizin.de/resource/supplementary/13256_2013_2673_MOESM1_ESM.pdf/9650802)

MM / CD3

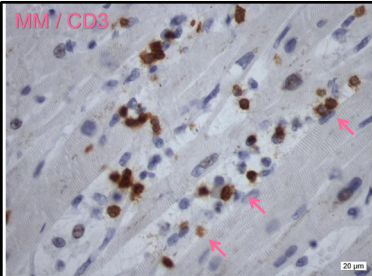

SM / CD3

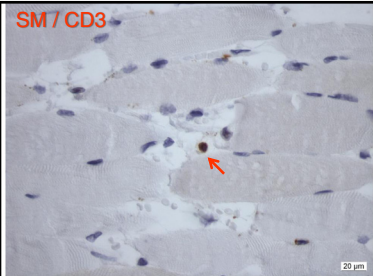

MM / TIA

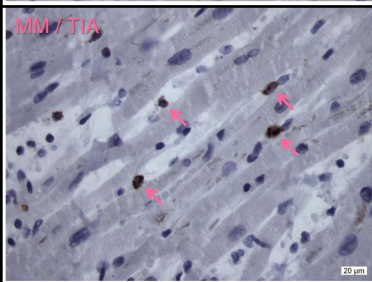

SM / TIA

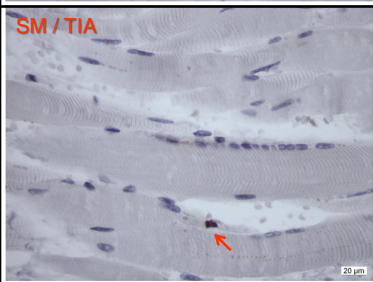

Supplement: MOESM1 [file 9650802]
